# Supplementary material
Source: PubMed Central journal article supplement (PMC3719699)
Supplement: AAC.00547-13_zac999102067so1.pdf [file AAC.00547-13_zac999102067so1.pdf]

# **Pharmacokinetics of a multipurpose pod-intravaginal ring simultaneously delivering five drugs in the ovine model**

John A. Moss,<sup>1</sup> Amanda M. Malone,<sup>2</sup> Thomas J. Smith,<sup>1,2</sup> Sean Kennedy,<sup>1</sup> Cali Nguyen,<sup>1,2</sup>  
Kathleen L. Vincent,<sup>3</sup> Massoud Motamedi,<sup>3</sup> and Marc M. Baum<sup>\*1</sup>

<sup>1</sup>*Department of Chemistry, Oak Crest Institute of Science, 2275 E. Foothill Blvd., Pasadena,  
California*

<sup>2</sup>*Auritec Pharmaceuticals, Inc., 1512 11th. Street, Suite 203, Santa Monica, California*

<sup>3</sup>*Center for Biomedical Engineering, 301 University Boulevard, University of Texas Medical  
Branch at Galveston, Texas*

\*Corresponding author. Mailing address: Department of Chemistry, Oak Crest Institute of  
Science, 2275 E. Foothill Blvd., Pasadena, California. Phone: (626) 817 0883. Fax: (626) 817  
0884. E-mail: m.baum@oak-crest.org.

## Supplemental Material

---

### MATERIALS AND METHODS

**Bioanalysis methods.** Samples were prepared for bioanalysis by filtration (CVL) or protein precipitation (plasma, pulverized tissue) and were analyzed by LC-MS using an Agilent Series 1100 LC coupled to an Agilent 1100 single-quadrupole MSD and ESI source with instrument control and data analysis using ChemStation software. The LC-MS methods were as follows:

*TFV, NVP, SQV, and ETG in CVL:* naproxen internal standard; Zorbax Eclipse XDB-C8 column (2.1 × 150 mm 3.5 μm, Agilent); gradient program: 3 min hold at 100:0 A:B (A, 0.1% acetic acid in water; B, 0.1% acetic acid in methanol), 22 min ramp to 27:73 A:B; ESI<sup>+</sup> detection.

*TFV, NVP, SQV, and ETG in vaginal tissues:* naproxen internal standard; Zorbax Poroshell 300SB-C3 column (2.1 × 150 mm 5 μm, Agilent); gradient program: 3 min hold at 100: 0 A:B (A, 0.1% acetic acid in water; B, 0.1% acetic acid in methanol), 27 min ramp to 0:100 A:B; ESI<sup>+</sup> detection.

*EE in CVL and vaginal tissue:* naproxen internal standard; ODS Hypersil column (2.1 × 150 mm 3 μm, Agilent); gradient program: 4 min ramp from 90:10 A:B (A, 15 mM ammonium hydroxide in water; B, acetonitrile), 5 min ramp from 50:50 to 0:100 A:B (for vaginal tissues, 4 min ramp from 90:10 A:B to 0:100 A:B, 1 min hold at A:B 0:100); ESI<sup>-</sup> detection.

For CVL, the LLOQs were: TFV, 5 ng mL<sup>-1</sup>; NVP, 2.5 ng mL<sup>-1</sup>; SQV, 5 ng mL<sup>-1</sup>; ETG, 10 ng mL<sup>-1</sup>; and EE, 0.5 ng mL<sup>-1</sup>.

For tissue, the LLOQs were: TFV, 0.5 ng g<sup>-1</sup>; NVP, 1 ng g<sup>-1</sup>; SQV, 5 ng g<sup>-1</sup>; ETG, 1 ng g<sup>-1</sup>; and EE, 0.5 ng g<sup>-1</sup>.
